# Supplementary material
Source: ML conference proceedings conference paper supplement (https://openaccess.thecvf.com/content/CVPR2025/html/Liu_GaussHDR_High_Dynamic_CVPR_2025_paper.html)
Supplement: Supplementary file 2 [file Liu_GaussHDR_High_Dynamic_CVPR_2025_supplemental.zip]

# GaussHDR: High Dynamic Range Gaussian Splatting via Learning Unified 3D and 2D Local Tone Mapping

## Supplementary Material

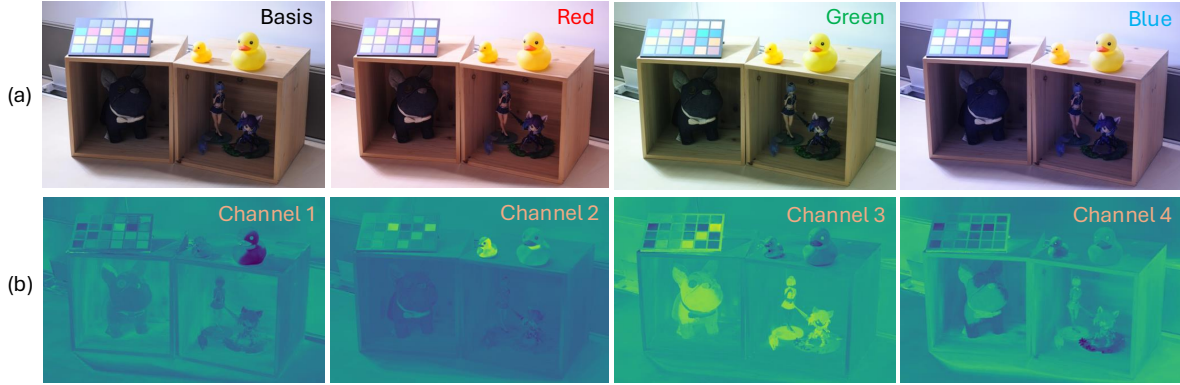

Figure 1. (a) By multiplying a factor to different RGB channels, we can control the white balance. (b) We visualize the 4-dimension context features channel by channel, which shows that different channels focus on capturing the tone-mapping characteristics of various regions.

### 1. Additional Implementation Details

**Datasets.** The original image resolutions of HDR-NeRF [2] synthetic and real datasets are  $800 \times 800$  and  $3216 \times 2136$ , respectively. We operate on the  $\frac{1}{2}$  scale for synthetic scenes, *i.e.*, a resolution of  $400 \times 400$ , and the  $\frac{1}{4}$  scale for real scenes, *i.e.*, a resolution of  $804 \times 534$ . For the four additional HDR-Plenoxels [3] real scenes, *desk* and *plant* scenes contain five different exposure times  $\{t_1, t_2, t_3, t_4, t_5\}$ , while *character* and *coffee* scenes include only three exposure times  $\{t_1, t_3, t_5\}$ . Consequently, we compute the averaged LDR-OE ( $t_1, t_3, t_5$ ) metrics across the four scenes and the averaged LDR-NE ( $t_2, t_4$ ) metrics over the *desk* and *plant* scenes. The original resolution of HDR-Plenoxels datasets is  $5952 \times 4480$ . We operate on the  $\frac{1}{6}$  scale, leading to a resolution of  $992 \times 746$ .

**Training Details.** When employing 3DGS [5] and ScaffoldGS [8] representations, we adhere to the same training parameters as those specified in [5] and [8], respectively. For our local tone mapper and uncertainty model, the learning rate is initially set to  $5 \times 10^{-4}$  and exponentially decays to  $5 \times 10^{-5}$ .

### 2. Additional Results

#### 2.1. Performance Comparison

The HDR irradiance, tone mapper, and context features are coupled during the scene-specific optimization. However, once we have obtained the HDR radiance field, we can still control the white balance by multiplying a factor to different channels, as shown in Fig. 1(a). Similarly, we can ignore

the context features and switch to other known global tone mappers for different styles, since the context features are only applicable to the learned local tone mapper.

#### 2.2. Performance Comparison

We have presented the quantitative comparison results under the Exp-3 setting in the main paper. Here, we provide the results under Exp-1 setting, which strictly follows HDR-NeRF [2] by randomly selecting one exposure from  $\{t_1, t_3, t_5\}$  for each view and keeping it fixed during training. The quantitative results for the real and synthetic datasets are listed in Tab. 2 and Tab. 3, respectively. Per-scene quantitative comparison outcomes are depicted in Tabs. 4 to 7. Additionally, we offer more examples of LDR and HDR qualitative results in the supplementary material, as demonstrated in Fig. 2 and Fig. 3, respectively. We also present three video demos corresponding to three different scenes: *bathroom* from HDR-NeRF [2] synthetic datasets, *flower* from HDR-NeRF real datasets, and *character* from HDR-Plenoxels [3] datasets. All the results further demonstrate that our method achieves state-of-the-art performance by improving both HDR and LDR learning.

#### 2.3. Ablation on Uncertainty Learning

In the main paper, to investigate the effect of uncertainty learning, we perform experiments using a mixed loss function defined as  $\mathcal{L} = \beta \mathcal{L}_{3d} + (1 - \beta) \mathcal{L}_{2d}$ , which simply combines  $\mathcal{L}_{3d}$  and  $\mathcal{L}_{2d}$  through weighted summation. Then, we plot the performance variations of  $I_{3d}^*$  and  $I_{2d}^*$  with respect to the hyper-parameter  $\beta$ . Here, we show the results of more scenes, as depicted in Fig. 4, indicating that different scenes

Table 1. Additional ablation results on HDR-NeRF[2] datasets. Pos. indicates using Gaussian position as context feature for local tone-mapping. LDR PSNR denotes the average metric over all 5 exposures. All experiments are under the Exp-1 setting.

|     | Method                                      | HDR-NeRF [2] Real Scenes | HDR-NeRF [2] Synthetic Scenes |              |
|-----|---------------------------------------------|--------------------------|-------------------------------|--------------|
|     |                                             | LDR PSNR                 | LDR PSNR                      | HDR PSNR     |
| (a) | Ours-3DGS (with raw Pos.)                   | 32.68                    | 40.21                         | 36.91        |
| (b) | Ours-3DGS (with fourier-encoded Pos.)       | 32.95                    | 40.63                         | 37.09        |
| (c) | Ours-3DGS                                   | <b>33.58</b>             | <b>41.32</b>                  | <b>37.41</b> |
| (d) | Ours-Scaffold-GS (direct learnable weights) | 34.03                    | 42.01                         | 38.12        |
| (e) | Ours-Scaffold-GS (3-layer MLPs, 128 nodes)  | <b>34.75</b>             | 42.43                         | 38.67        |
| (f) | Ours-Scaffold-GS                            | 34.69                    | <b>42.57</b>                  | <b>38.60</b> |

Table 2. Quantitative comparisons on HDR-NeRF [2] and HDR-Plenoxels [3] real datasets. Metrics are averaged over all scenes. LDR-OE and LDR-NE denote the LDR results with exposure  $\{t_1, t_3, t_5\}$  and  $\{t_2, t_4\}$ , respectively. The training exposure setting is Exp-1.

| Method                    | HDR-NeRF [2] Real Scenes   |                 |                    |                       |                 |                    | HDR-Plenoxels [3] Real Scenes |                 |                    |                       |                 |                    |
|---------------------------|----------------------------|-----------------|--------------------|-----------------------|-----------------|--------------------|-------------------------------|-----------------|--------------------|-----------------------|-----------------|--------------------|
|                           | LDR-OE ( $t_1, t_3, t_5$ ) |                 |                    | LDR-NE ( $t_2, t_4$ ) |                 |                    | LDR-OE ( $t_1, t_3, t_5$ )    |                 |                    | LDR-NE ( $t_2, t_4$ ) |                 |                    |
|                           | PSNR $\uparrow$            | SSIM $\uparrow$ | LPIPS $\downarrow$ | PSNR $\uparrow$       | SSIM $\uparrow$ | LPIPS $\downarrow$ | PSNR $\uparrow$               | SSIM $\uparrow$ | LPIPS $\downarrow$ | PSNR $\uparrow$       | SSIM $\uparrow$ | LPIPS $\downarrow$ |
| HDR-NeRF [2]              | 31.63                      | 0.948           | 0.069              | 31.43                 | 0.943           | 0.069              | -                             | -               | -                  | -                     | -               | -                  |
| HDR-GS [1] $\dagger$      | 33.56                      | 0.964           | 0.024              | 31.18                 | 0.960           | 0.027              | 30.18                         | 0.943           | 0.044              | 27.63                 | 0.916           | 0.056              |
| <b>Ours (3DGS)</b>        | 34.18                      | 0.965           | 0.019              | 32.63                 | 0.962           | 0.021              | 30.99                         | 0.947           | 0.041              | 28.08                 | 0.923           | 0.050              |
| HDR-Scaffold-GS [8] *     | 34.09                      | 0.967           | 0.016              | 31.88                 | 0.964           | 0.019              | 31.05                         | 0.944           | 0.045              | 28.13                 | 0.916           | 0.059              |
| <b>Ours (Scaffold-GS)</b> | <b>35.37</b>               | <b>0.972</b>    | <b>0.014</b>       | <b>33.68</b>          | <b>0.969</b>    | <b>0.016</b>       | <b>32.24</b>                  | <b>0.954</b>    | <b>0.031</b>       | <b>28.98</b>          | <b>0.932</b>    | <b>0.041</b>       |

$\dagger$  We re-implement HDR-GS [1] under Exp-1 setting for fair comparison.

\* We replace the scene representation in HDR-GS from 3DGS [5] to Scaffold-GS [8] to establish a baseline for our method utilizing Scaffold-GS.

exhibit varying balances between  $\mathcal{L}_{3d}$  and  $\mathcal{L}_{2d}$ . However, our uncertainty-based modulation can robustly achieve optimal results across diverse scenes.

?? in the main paper can be viewed as a regularization term that encourages the model to learn meaningful uncertainties or variances. In this part, we also try to directly employ learnable weights for the dual LDR results without any regularization. As shown in Tab. 1(d), this approach results in a performance drop, again highlighting the effectiveness of our uncertainty modeling.

## 2.4. Ablation on Tone-mapper MLPs

Since RGB channels may have different tone-mapping characteristics in real-world scenarios. Hence, using channel-specific MLPs for tone mapper is helpful, which has been verified in the HDR-NeRF [2] paper. Here, we also experiment with larger tone-mapper MLPs with deeper layers and more hidden nodes, as listed in Tab. 1(e). We can see that larger MLPs do not bring further improvements, but will increase the training and inference cost.

## 2.5. Ablation on Context Feature

In the main paper, we claim that utilizing pixel positions in image space for 2D local tone mapping is infeasible, as we need to distinguish the same pixel position across different views. However, we can directly leverage Gaussian positions as tone-mapping context features and render them into image space. We conduct ablation experiments for this with 3DGS [5] representation, since Scaffold-GS [8] utilizes anchor context features to predict Gaussian positions. As listed in Tab. 1(a,b), it will cause a degraded

performance with either raw Gaussian positions or Fourier-encoded ones. Using Gaussian positions implies that various Gaussians that are far apart must possess distinct tone-mapping characteristics. However, in fact, different spatial locations may exhibit similar characteristics.

We also visualize the 4-dimension context feature channel by channel in Fig. 1(b), which indicates that different channels focus on capturing the tone-mapping characteristics of various regions.

## 3. Limitations

Despite the significant enhancements in HDR reconstruction and LDR fitting capabilities provided by GaussHDR, some limitations remain. First, our method relies on COLMAP [10] to extract the initial point cloud and compute camera poses. In other words, we must use tripod-mounted cameras to capture multi-exposure images at each sampled view. However, a more general application scenario could involve utilizing a hand-held camera to capture a monocular video around the scene, where each frame (or view) has a single exposure level, making it difficult to match images captured under different exposures in COLMAP. Therefore, a potential direction for future work is to develop a COLMAP-free version of GaussHDR. Second, it is promising to introduce depth priors to enhance geometry reconstruction by utilizing off-the-shelf depth models [4, 6, 7, 9, 11, 12]. Finally, our method focuses on static scenes and lacks the ability to perform HDR reconstruction in dynamic environments, which is also an area worth exploring.

Table 3. Quantitative comparisons on HDR-NeRF [2] synthetic datasets. Metrics are averaged over all scenes. LDR-OE and LDR-NE denote the LDR results with exposure  $\{t_1, t_3, t_5\}$  and  $\{t_2, t_4\}$ , respectively. HDR denotes the HDR results. The training setting is Exp-1.

| Method                    | LDR-OE ( $t_1, t_3, t_5$ ) |                 |                    | LDR-NE ( $t_2, t_4$ ) |                 |                    | HDR             |                 |                    |
|---------------------------|----------------------------|-----------------|--------------------|-----------------------|-----------------|--------------------|-----------------|-----------------|--------------------|
|                           | PSNR $\uparrow$            | SSIM $\uparrow$ | LPIPS $\downarrow$ | PSNR $\uparrow$       | SSIM $\uparrow$ | LPIPS $\downarrow$ | PSNR $\uparrow$ | SSIM $\uparrow$ | LPIPS $\downarrow$ |
| HDR-NeRF [2]              | 39.07                      | 0.973           | 0.026              | 37.53                 | 0.966           | 0.024              | 36.40           | 0.936           | 0.018              |
| HDR-GS [1] $\dagger$      | 39.35                      | 0.977           | 0.012              | 38.01                 | 0.976           | 0.013              | 22.58           | 0.840           | 0.075              |
| <b>Ours (3DGS)</b>        | 41.51                      | 0.984           | 0.008              | 41.03                 | 0.983           | 0.009              | 37.41           | 0.969           | 0.017              |
| HDR-Scaffold-GS [8] *     | 42.21                      | 0.986           | 0.005              | 40.44                 | 0.986           | 0.006              | 26.11           | 0.915           | 0.062              |
| <b>Ours (Scaffold-GS)</b> | <b>42.94</b>               | <b>0.988</b>    | <b>0.004</b>       | <b>42.02</b>          | <b>0.988</b>    | <b>0.005</b>       | <b>38.60</b>    | <b>0.975</b>    | <b>0.011</b>       |

$\dagger$  We re-implement HDR-GS [1] under Exp-1 setting for fair comparison. Note that the authors of HDR-GS utilize HDR ground truth (GT) for supervision during training on synthetic datasets, whereas our re-implementation does not include this supervision.

\* We replace the scene representation in HDR-GS from 3DGS [5] to Scaffold-GS [8] to establish a baseline for our method utilizing Scaffold-GS.

Table 4. Per-scene quantitative comparisons on HDR-NeRF [2] real datasets. LDR-OE and LDR-NE denote the LDR results with exposure  $\{t_1, t_3, t_5\}$  and  $\{t_2, t_4\}$ , respectively. The training exposure setting is Exp-1.

|        | Method                    | Box             |                 |                    | Computer        |                 |                    | Flower          |                 |                    | Luckycat        |                 |                    |
|--------|---------------------------|-----------------|-----------------|--------------------|-----------------|-----------------|--------------------|-----------------|-----------------|--------------------|-----------------|-----------------|--------------------|
|        |                           | PSNR $\uparrow$ | SSIM $\uparrow$ | LPIPS $\downarrow$ | PSNR $\uparrow$ | SSIM $\uparrow$ | LPIPS $\downarrow$ | PSNR $\uparrow$ | SSIM $\uparrow$ | LPIPS $\downarrow$ | PSNR $\uparrow$ | SSIM $\uparrow$ | LPIPS $\downarrow$ |
| LDR-OE | HDR-NeRF [2]              | 31.54           | 0.953           | 0.068              | 32.42           | 0.950           | 0.077              | 29.81           | 0.948           | 0.069              | 32.85           | 0.938           | 0.062              |
|        | HDR-GS [1] $\dagger$      | 34.39           | 0.973           | 0.016              | 34.41           | 0.967           | 0.020              | 31.62           | 0.956           | 0.037              | 33.82           | 0.961           | 0.022              |
|        | <b>Ours (3DGS)</b>        | 35.87           | 0.976           | 0.012              | 34.99           | 0.967           | 0.020              | 31.84           | 0.958           | 0.024              | 34.03           | 0.961           | 0.020              |
|        | HDR-Scaffold-GS [8] *     | 34.66           | 0.974           | 0.012              | 34.55           | 0.965           | 0.017              | 32.70           | 0.967           | 0.019              | 34.43           | 0.963           | 0.016              |
|        | <b>Ours (Scaffold-GS)</b> | <b>36.24</b>    | <b>0.979</b>    | <b>0.010</b>       | <b>35.50</b>    | <b>0.970</b>    | <b>0.015</b>       | <b>34.12</b>    | <b>0.971</b>    | <b>0.014</b>       | <b>35.61</b>    | <b>0.970</b>    | <b>0.015</b>       |
| LDR-NE | HDR-NeRF [2]              | 31.40           | 0.944           | 0.079              | 31.21           | 0.931           | 0.098              | 30.05           | 0.949           | 0.058              | 33.13           | 0.948           | 0.051              |
|        | HDR-GS [1] $\dagger$      | 30.17           | 0.967           | 0.021              | 32.78           | 0.966           | 0.023              | 30.21           | 0.954           | 0.039              | 31.55           | 0.954           | 0.026              |
|        | <b>Ours (3DGS)</b>        | 32.57           | 0.972           | 0.014              | 34.18           | 0.966           | 0.022              | 30.52           | 0.956           | 0.027              | 33.24           | 0.956           | 0.022              |
|        | HDR-Scaffold-GS [8] *     | 31.87           | 0.970           | 0.015              | 33.16           | 0.964           | 0.019              | 30.68           | 0.964           | 0.021              | 31.80           | 0.957           | 0.019              |
|        | <b>Ours (Scaffold-GS)</b> | <b>32.93</b>    | <b>0.974</b>    | <b>0.013</b>       | <b>34.95</b>    | <b>0.968</b>    | <b>0.017</b>       | <b>32.35</b>    | <b>0.970</b>    | <b>0.016</b>       | <b>34.48</b>    | <b>0.965</b>    | <b>0.016</b>       |

$\dagger$  We re-implement HDR-GS [1] under Exp-1 setting for fair comparison.

\* We replace the scene representation in HDR-GS from 3DGS [5] to Scaffold-GS [8] to establish a baseline for our method utilizing Scaffold-GS.

## References

- [1] Yuanhao Cai, Zihao Xiao, Yixun Liang, Yulun Zhang, Xiaokang Yang, Yaoyao Liu, and Alan Yuille. Hdr-gs: Efficient high dynamic range novel view synthesis at 1000x speed via gaussian splatting. In *NeurIPS*, 2024. 2, 3, 4
- [2] Xin Huang, Qi Zhang, Ying Feng, Hongdong Li, Xuan Wang, and Qing Wang. Hdr-nerf: High dynamic range neural radiance fields. In *CVPR*, pages 18377–18387, 2022. 1, 2, 3, 4, 6
- [3] Kim Jun-Seong, Kim Yu-Ji, Moon Ye-Bin, and Tae-Hyun Oh. Hdr-plenoxels: Self-calibrating high dynamic range radiance fields. In *ECCV*, pages 384–401, 2022. 1, 2, 4
- [4] Bingxin Ke, Anton Obukhov, and Shengyu Huang. Repurposing diffusion-based image generators for monocular depth estimation. In *CVPR*, pages 9492–9502, 2024. 2
- [5] Bernhard Kerbl, Georgios Kopanas, Thomas Leimkühler, and George Drettakis. 3d gaussian splatting for real-time radiance field rendering. *ACM TOG*, 42(4):1–14, 2023. 1, 2, 3, 4
- [6] Jinfeng Liu, Lingtong Kong, Bo Li, Zerong Wang, Hong Gu, and Jinwei Chen. Mono-vifi: A unified learning framework for self-supervised single and multi-frame monocular depth estimation. In *ECCV*, pages 90–107, 2024. 2
- [7] Jinfeng Liu, Lingtong Kong, Jie Yang, and Wei Liu. Towards better data exploitation in self-supervised monocular depth estimation. *IEEE Robotics and Automation Letters*, 9(1):763–770, 2024. 2
- [8] Tao Lu, Mulin Yu, Linning Xu, Yuanbo Xiangli, Limin Wang, and Dahua Lin. Scaffold-gs: Structured 3d gaussians for view-adaptive rendering. In *CVPR*, pages 20654–20664, 2024. 1, 2, 3, 4
- [9] Luigi Piccinelli, Yung-Hsu Yang, Christos Sakaridis, Mattia Segu, Siyuan Li, Luc Van Gool, and Fisher Yu. Unidepth: Universal monocular metric depth estimation. In *CVPR*, pages 10106–10116, 2024. 2
- [10] Johannes L. Schönberger and Jan-Michael Frahm. Structure-from-motion revisited. In *CVPR*, pages 4104–4113, 2016. 2
- [11] Lihe Yang, Bingyi Kang, Zilong Huang, Xiaogang Xu, Jiashi Feng, and Hengshuang Zhao. Depth anything: Unleashing the power of large-scale unlabeled data. In *CVPR*, pages 10371–10381, 2024. 2
- [12] Wei Yin, Chi Zhang, Hao Chen, Zhipeng Cai, Gang Yu, Kaixuan Wang, Xiaozhi Chen, and Chunhua Shen. Metric3d: Towards zero-shot metric 3d prediction from a single image. In *ICCV*, pages 9009–9019, 2023. 2

Table 5. Per-scene quantitative comparisons on HDR-Plenoxels [3] real datasets. LDR-OE and LDR-NE denote the LDR results with exposure  $\{t_1, t_3, t_5\}$  and  $\{t_2, t_4\}$ , respectively. The training exposure setting is Exp-1.

|        | Method                    | Character       |                 |                    | Coffee          |                 |                    | Desk            |                 |                    | Plant           |                 |                    |
|--------|---------------------------|-----------------|-----------------|--------------------|-----------------|-----------------|--------------------|-----------------|-----------------|--------------------|-----------------|-----------------|--------------------|
|        |                           | PSNR $\uparrow$ | SSIM $\uparrow$ | LPIPS $\downarrow$ | PSNR $\uparrow$ | SSIM $\uparrow$ | LPIPS $\downarrow$ | PSNR $\uparrow$ | SSIM $\uparrow$ | LPIPS $\downarrow$ | PSNR $\uparrow$ | SSIM $\uparrow$ | LPIPS $\downarrow$ |
| LDR-OE | HDR-GS [1] $\dagger$      | 34.96           | 0.978           | 0.027              | 27.79           | 0.943           | 0.049              | 28.78           | 0.922           | 0.045              | 29.18           | 0.930           | 0.054              |
|        | <b>Ours (3DGS)</b>        | 36.73           | 0.980           | 0.025              | 28.35           | 0.947           | 0.046              | 29.14           | 0.925           | 0.041              | 29.76           | 0.934           | 0.051              |
|        | HDR-Scaffold-GS [8] *     | 36.81           | 0.979           | 0.029              | 28.31           | 0.946           | 0.043              | 28.64           | 0.919           | 0.049              | 30.44           | 0.930           | 0.059              |
|        | <b>Ours (Scaffold-GS)</b> | <b>38.24</b>    | <b>0.983</b>    | <b>0.018</b>       | <b>29.31</b>    | <b>0.955</b>    | <b>0.032</b>       | <b>29.91</b>    | <b>0.933</b>    | <b>0.035</b>       | <b>31.48</b>    | <b>0.945</b>    | <b>0.040</b>       |
| LDR-NE | HDR-GS [1] $\dagger$      | -               | -               | -                  | -               | -               | -                  | 27.08           | 0.912           | 0.050              | 28.17           | 0.920           | 0.061              |
|        | <b>Ours (3DGS)</b>        | -               | -               | -                  | -               | -               | -                  | 27.30           | 0.917           | 0.044              | 28.85           | 0.929           | 0.055              |
|        | HDR-Scaffold-GS [8] *     | -               | -               | -                  | -               | -               | -                  | 27.03           | 0.911           | 0.053              | 29.23           | 0.920           | 0.065              |
|        | <b>Ours (Scaffold-GS)</b> | -               | -               | -                  | -               | -               | -                  | <b>27.41</b>    | <b>0.922</b>    | <b>0.038</b>       | <b>30.55</b>    | <b>0.941</b>    | <b>0.044</b>       |

$\dagger$  We re-implement HDR-GS [1] under Exp-1 setting for fair comparison.

\* We replace the scene representation in HDR-GS from 3DGS [5] to Scaffold-GS [8] to establish a baseline for our method utilizing Scaffold-GS.

Table 6. Per-scene quantitative comparisons on HDR-NeRF [2] synthetic datasets (Part 1). LDR-OE and LDR-NE denote the LDR results with exposure  $\{t_1, t_3, t_5\}$  and  $\{t_2, t_4\}$ , respectively. HDR denotes the HDR results. The training exposure setting is Exp-1.

|        | Method                    | Bathroom        |                 |                    | Bear            |                 |                    | Chair           |                 |                    | Diningroom      |                 |                    |
|--------|---------------------------|-----------------|-----------------|--------------------|-----------------|-----------------|--------------------|-----------------|-----------------|--------------------|-----------------|-----------------|--------------------|
|        |                           | PSNR $\uparrow$ | SSIM $\uparrow$ | LPIPS $\downarrow$ | PSNR $\uparrow$ | SSIM $\uparrow$ | LPIPS $\downarrow$ | PSNR $\uparrow$ | SSIM $\uparrow$ | LPIPS $\downarrow$ | PSNR $\uparrow$ | SSIM $\uparrow$ | LPIPS $\downarrow$ |
| LDR-OE | HDR-NeRF [2]              | 36.26           | 0.949           | 0.037              | 42.91           | 0.990           | 0.010              | 32.45           | 0.905           | 0.081              | 41.23           | 0.986           | 0.010              |
|        | HDR-GS [1] $\dagger$      | 38.06           | 0.963           | 0.020              | 41.61           | 0.989           | 0.005              | 35.07           | 0.952           | 0.024              | 38.26           | 0.979           | 0.014              |
|        | <b>Ours (3DGS)</b>        | 41.12           | 0.975           | 0.008              | 44.44           | 0.992           | 0.003              | 37.05           | 0.968           | 0.014              | 39.63           | 0.981           | 0.017              |
|        | HDR-Scaffold-GS [8] *     | 41.21           | 0.977           | 0.008              | 44.56           | 0.992           | 0.003              | 36.36           | 0.966           | 0.016              | 44.87           | <b>0.994</b>    | <b>0.002</b>       |
|        | <b>Ours (Scaffold-GS)</b> | <b>42.08</b>    | <b>0.981</b>    | <b>0.006</b>       | <b>45.40</b>    | <b>0.993</b>    | <b>0.002</b>       | <b>37.65</b>    | <b>0.971</b>    | <b>0.012</b>       | <b>45.21</b>    | <b>0.994</b>    | <b>0.002</b>       |
| LDR-NE | HDR-NeRF [2]              | 33.44           | 0.926           | 0.046              | 41.19           | 0.987           | 0.012              | 30.78           | 0.886           | 0.083              | 37.99           | 0.979           | 0.013              |
|        | HDR-GS [1] $\dagger$      | 36.03           | 0.963           | 0.024              | 41.69           | 0.988           | 0.005              | 34.05           | 0.951           | 0.026              | 34.62           | 0.976           | 0.020              |
|        | <b>Ours (3DGS)</b>        | 41.10           | 0.977           | 0.008              | 43.85           | 0.992           | 0.003              | 36.53           | 0.967           | 0.015              | 38.78           | 0.980           | 0.021              |
|        | HDR-Scaffold-GS [8] *     | 40.61           | 0.979           | 0.008              | 42.10           | 0.992           | 0.004              | 35.89           | 0.965           | 0.017              | 41.00           | <b>0.993</b>    | <b>0.003</b>       |
|        | <b>Ours (Scaffold-GS)</b> | <b>41.71</b>    | <b>0.982</b>    | <b>0.007</b>       | <b>44.43</b>    | <b>0.993</b>    | <b>0.002</b>       | <b>37.14</b>    | <b>0.970</b>    | <b>0.013</b>       | <b>43.33</b>    | <b>0.993</b>    | <b>0.003</b>       |
| HDR    | HDR-NeRF [2]              | 33.97           | 0.925           | 0.048              | <b>43.22</b>    | <b>0.991</b>    | 0.008              | 34.14           | 0.924           | 0.069              | 38.57           | 0.981           | 0.015              |
|        | HDR-GS [1] $\dagger$      | 15.48           | 0.739           | 0.125              | 30.99           | 0.961           | 0.027              | 20.47           | 0.751           | 0.115              | 18.86           | 0.860           | 0.074              |
|        | <b>Ours (3DGS)</b>        | 34.87           | 0.943           | 0.024              | 41.47           | 0.987           | 0.007              | 36.75           | 0.961           | 0.019              | 34.82           | 0.967           | 0.028              |
|        | HDR-Scaffold-GS [8] *     | 22.28           | 0.873           | 0.061              | 29.79           | 0.970           | 0.021              | 24.27           | 0.842           | 0.163              | 26.60           | 0.952           | 0.037              |
|        | <b>Ours (Scaffold-GS)</b> | <b>36.22</b>    | <b>0.952</b>    | <b>0.017</b>       | 42.23           | 0.988           | <b>0.005</b>       | <b>37.79</b>    | <b>0.966</b>    | <b>0.017</b>       | <b>38.61</b>    | <b>0.983</b>    | <b>0.007</b>       |

$\dagger$  We re-implement HDR-GS [1] under Exp-1 setting for fair comparison.

\* We replace the scene representation in HDR-GS from 3DGS [5] to Scaffold-GS [8] to establish a baseline for our method utilizing Scaffold-GS.

Table 7. Per-scene quantitative comparisons on HDR-NeRF [2] synthetic datasets (Part 2). LDR-OE and LDR-NE denote the LDR results with exposure  $\{t_1, t_3, t_5\}$  and  $\{t_2, t_4\}$ , respectively. HDR denotes the HDR results. The training exposure setting is Exp-1.

|        | Method                    | Dog             |                 |                    | Desk            |                 |                    | Sofa            |                 |                    | Sponza          |                 |                    |
|--------|---------------------------|-----------------|-----------------|--------------------|-----------------|-----------------|--------------------|-----------------|-----------------|--------------------|-----------------|-----------------|--------------------|
|        |                           | PSNR $\uparrow$ | SSIM $\uparrow$ | LPIPS $\downarrow$ | PSNR $\uparrow$ | SSIM $\uparrow$ | LPIPS $\downarrow$ | PSNR $\uparrow$ | SSIM $\uparrow$ | LPIPS $\downarrow$ | PSNR $\uparrow$ | SSIM $\uparrow$ | LPIPS $\downarrow$ |
| LDR-OE | HDR-NeRF [2]              | 37.77           | 0.981           | 0.016              | 37.84           | 0.972           | 0.023              | 38.29           | 0.977           | 0.014              | 34.49           | 0.958           | 0.034              |
|        | HDR-GS [1] $\dagger$      | 42.28           | 0.991           | 0.004              | 39.81           | 0.980           | 0.007              | 41.75           | 0.989           | 0.004              | 37.99           | 0.972           | 0.016              |
|        | <b>Ours (3DGS)</b>        | 43.06           | 0.992           | 0.004              | 42.28           | 0.987           | 0.004              | 43.04           | 0.990           | <b>0.003</b>       | 41.43           | 0.986           | 0.007              |
|        | HDR-Scaffold-GS [8] *     | 43.31           | 0.993           | 0.003              | 41.72           | 0.987           | 0.004              | 43.26           | <b>0.992</b>    | <b>0.003</b>       | 42.43           | 0.990           | <b>0.004</b>       |
|        | <b>Ours (Scaffold-GS)</b> | <b>43.76</b>    | <b>0.994</b>    | <b>0.002</b>       | <b>43.04</b>    | <b>0.990</b>    | <b>0.003</b>       | <b>43.44</b>    | <b>0.992</b>    | <b>0.003</b>       | <b>42.91</b>    | <b>0.991</b>    | <b>0.004</b>       |
| LDR-NE | HDR-NeRF [2]              | 36.52           | 0.976           | 0.018              | 35.26           | 0.960           | 0.029              | 38.35           | 0.976           | 0.014              | 33.41           | 0.950           | 0.038              |
|        | HDR-GS [1] $\dagger$      | 40.66           | 0.990           | 0.004              | 38.47           | 0.980           | 0.007              | 41.55           | 0.989           | 0.004              | 36.99           | 0.975           | 0.015              |
|        | <b>Ours (3DGS)</b>        | <b>42.24</b>    | 0.991           | 0.004              | 42.12           | 0.987           | 0.004              | <b>42.34</b>    | 0.991           | <b>0.003</b>       | 41.25           | 0.988           | 0.006              |
|        | HDR-Scaffold-GS [8] *     | 40.52           | 0.992           | 0.004              | 40.46           | 0.987           | 0.004              | 41.91           | 0.991           | 0.004              | 41.02           | 0.990           | 0.004              |
|        | <b>Ours (Scaffold-GS)</b> | 42.12           | <b>0.993</b>    | <b>0.003</b>       | <b>42.76</b>    | <b>0.989</b>    | <b>0.003</b>       | 42.03           | <b>0.992</b>    | <b>0.003</b>       | <b>42.60</b>    | <b>0.992</b>    | <b>0.003</b>       |
| HDR    | HDR-NeRF [2]              | <b>37.72</b>    | <b>0.980</b>    | 0.016              | 43.38           | <b>0.993</b>    | 0.007              | <b>39.05</b>    | <b>0.976</b>    | 0.017              | 32.33           | 0.939           | 0.049              |
|        | HDR-GS [1] $\dagger$      | 23.02           | 0.926           | 0.037              | 29.11           | 0.773           | 0.082              | 26.60           | 0.928           | 0.046              | 16.12           | 0.782           | 0.095              |
|        | <b>Ours (3DGS)</b>        | 36.36           | 0.973           | 0.016              | <b>43.98</b>    | <b>0.993</b>    | 0.006              | 36.70           | 0.966           | 0.016              | 34.32           | 0.964           | 0.023              |
|        | HDR-Scaffold-GS [8] *     | 24.33           | 0.934           | 0.040              | 31.40           | 0.929           | 0.044              | 28.42           | 0.947           | 0.032              | 21.81           | 0.870           | 0.095              |
|        | <b>Ours (Scaffold-GS)</b> | 37.52           | 0.978           | <b>0.012</b>       | 43.83           | <b>0.993</b>    | <b>0.005</b>       | 36.99           | 0.969           | <b>0.013</b>       | <b>35.64</b>    | <b>0.972</b>    | <b>0.014</b>       |

$\dagger$  We re-implement HDR-GS [1] under Exp-1 setting for fair comparison.

\* We replace the scene representation in HDR-GS from 3DGS [5] to Scaffold-GS [8] to establish a baseline for our method utilizing Scaffold-GS.



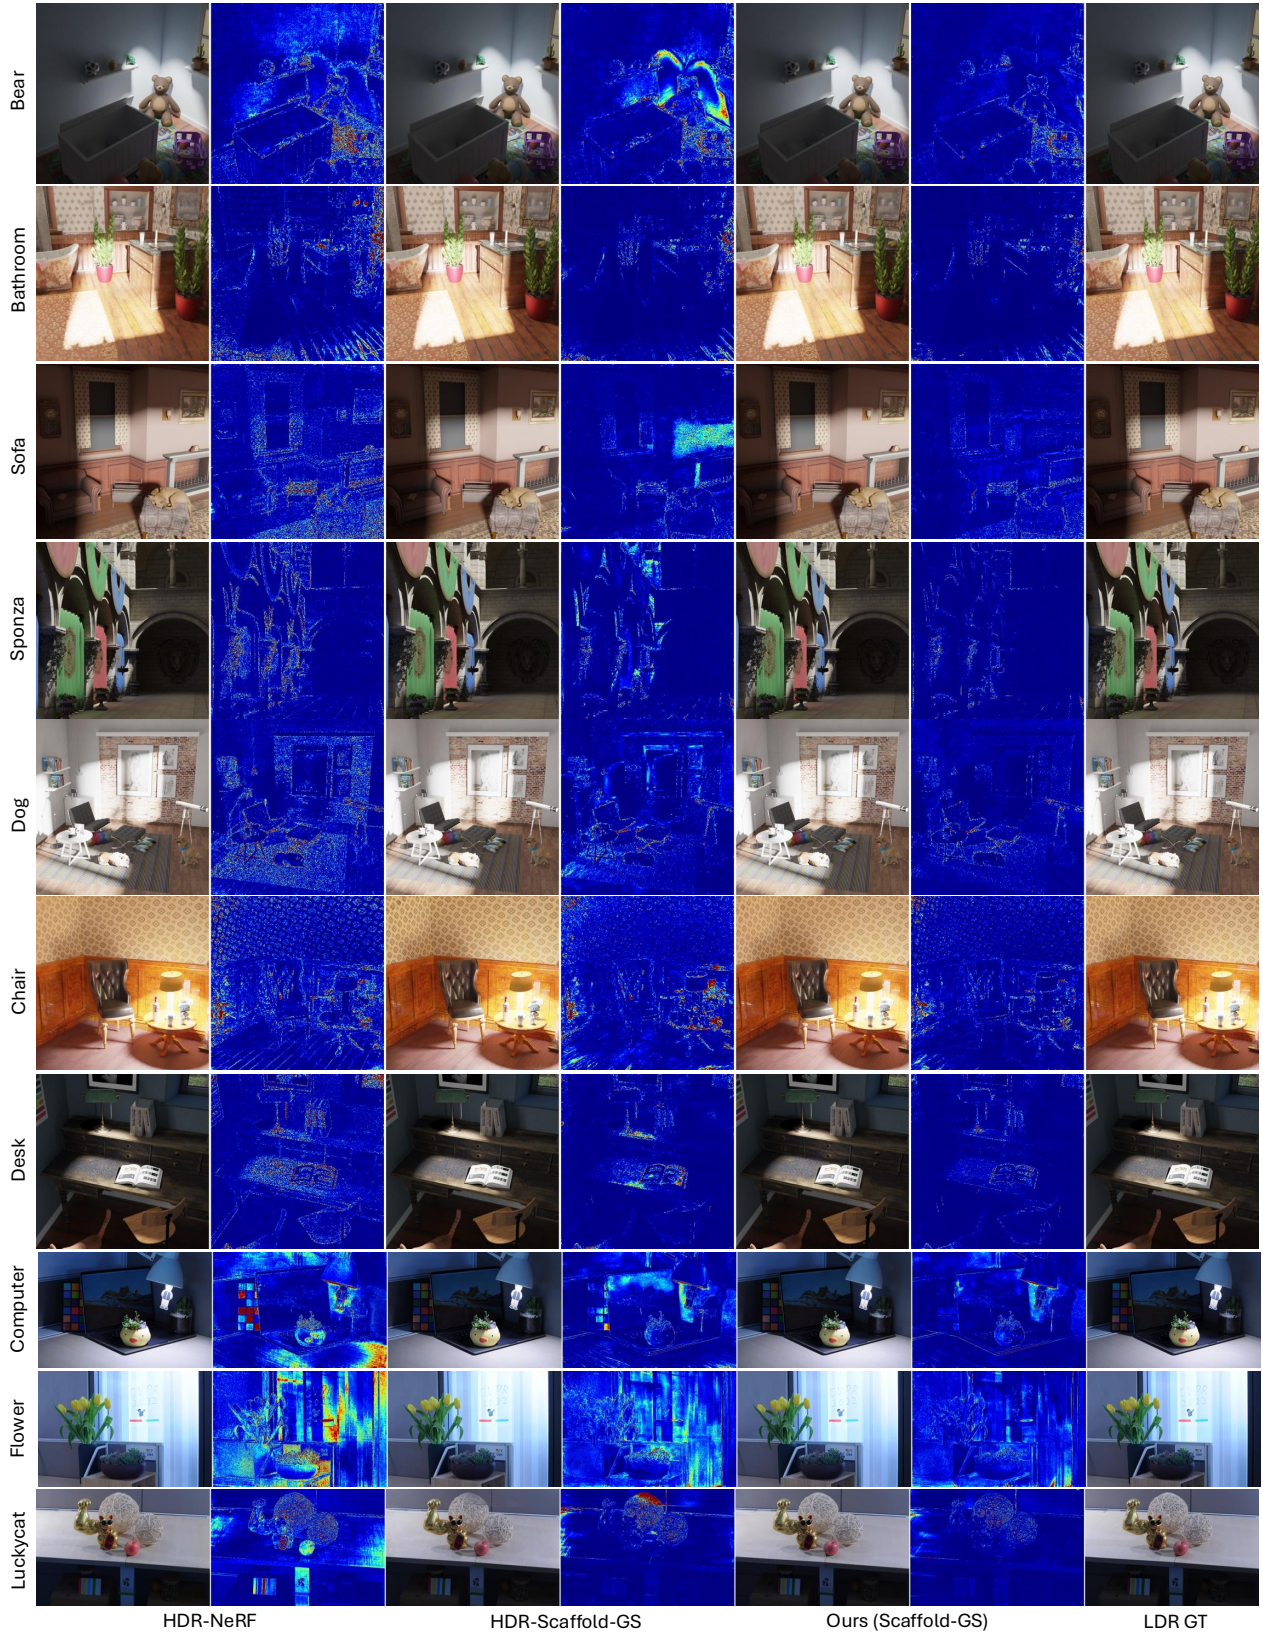

Figure 2. Qualitative LDR comparisons. Error maps in column 2, 4 and 6 show the MSE error compared to the ground truth, where color from blue to red indicates the error from small to large. Our method can reduce LDR fitting errors in some regions.



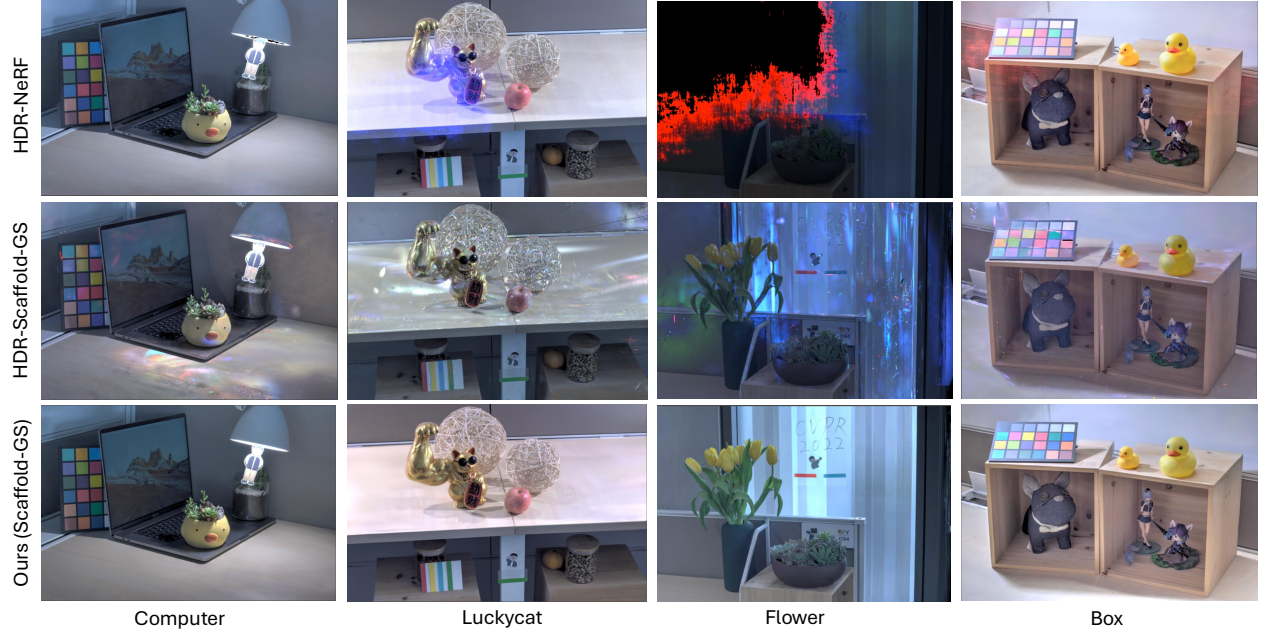

Figure 3. Qualitative HDR comparisons. Our method leads to stable HDR reconstruction results compared to the baselines.

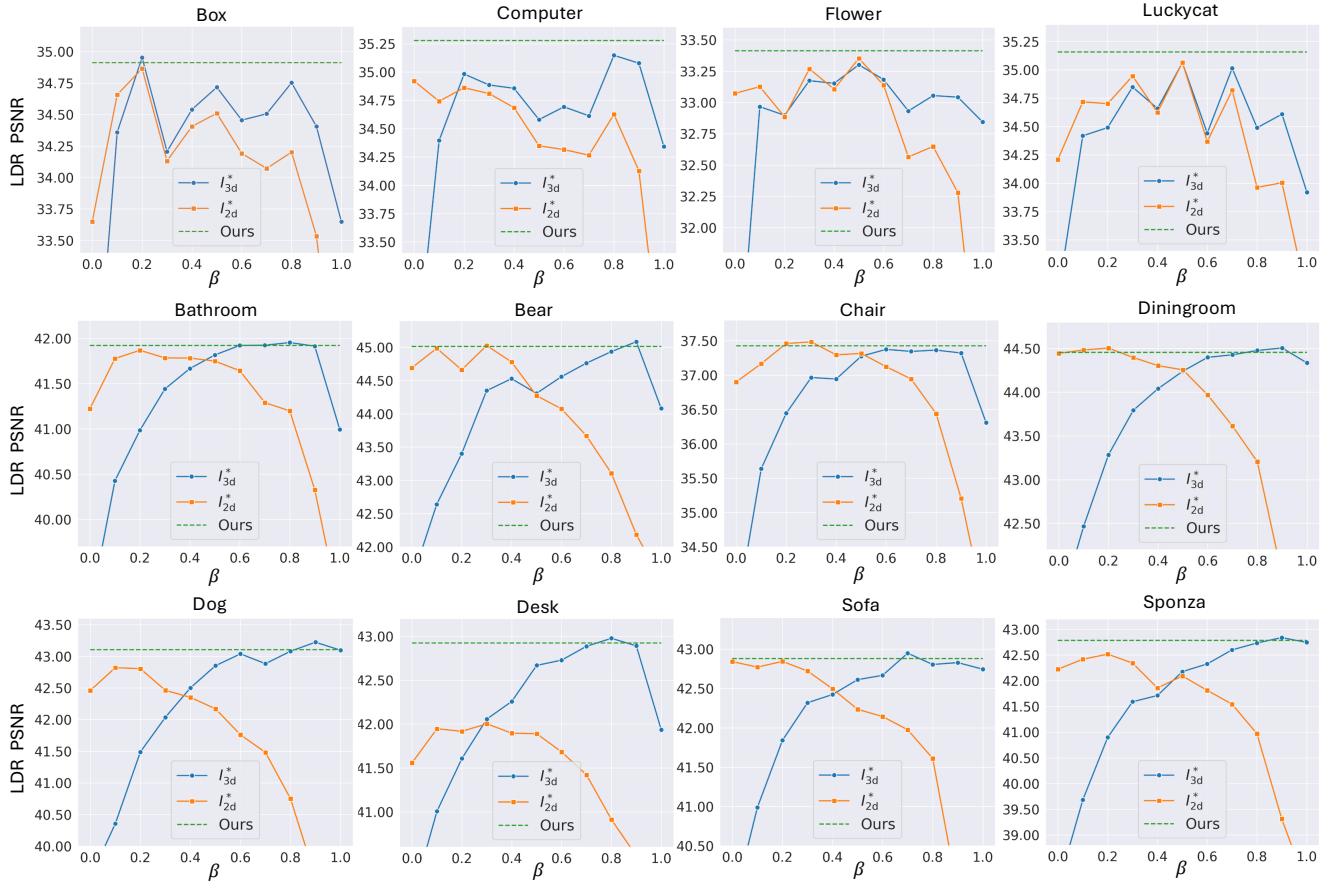

Figure 4. Performance variations of  $I_{3d}^*$  and  $I_{2d}^*$  with respect to  $\beta$  when simply using a loss combination  $\mathcal{L} = \beta \mathcal{L}_{3d} + (1 - \beta) \mathcal{L}_{2d}$ . Different scenes exhibit varying optimal values of  $\beta$ . In contrast, our uncertainty-based modulation (green dash line) can robustly achieve optimal results across diverse scenes without the selection of hyper-parameter  $\beta$ . Results include all of HDR-NeRF [2] real and synthetic scenes.
